# Supplementary material
Source: PubMed Central journal article supplement (PMC3361962)

**Supplementary Figure 1: Plot of the First Two Dimensions from MDS Analysis for the Japanese MS Sample and 11 HapMap Populations.** Dimensions derived from 705 non-chromosome 6 SNPs common between all 12 populations. The Japanese MS Sample (JpMS) clusters well with the other three Asian populations. ASW = African ancestry in Southwest USA; CEU = CEPH (NW European); CHB = Han Chinese in Beijing, China; CHD = Chinese in Denver, Colorado; GIH = Gujarati Indians in Houston, Texas; JPT = Japanese in Tokyo, Japan; LWK = Luhya in Webuye, Kenya; MEX = Mexican ancestry in Los Angeles, California; MKK = Maasai in Kinyawa, Kenya; TSI = Tuscan in Italy; YRI = Yoruban in Ibadan, Nigeria.

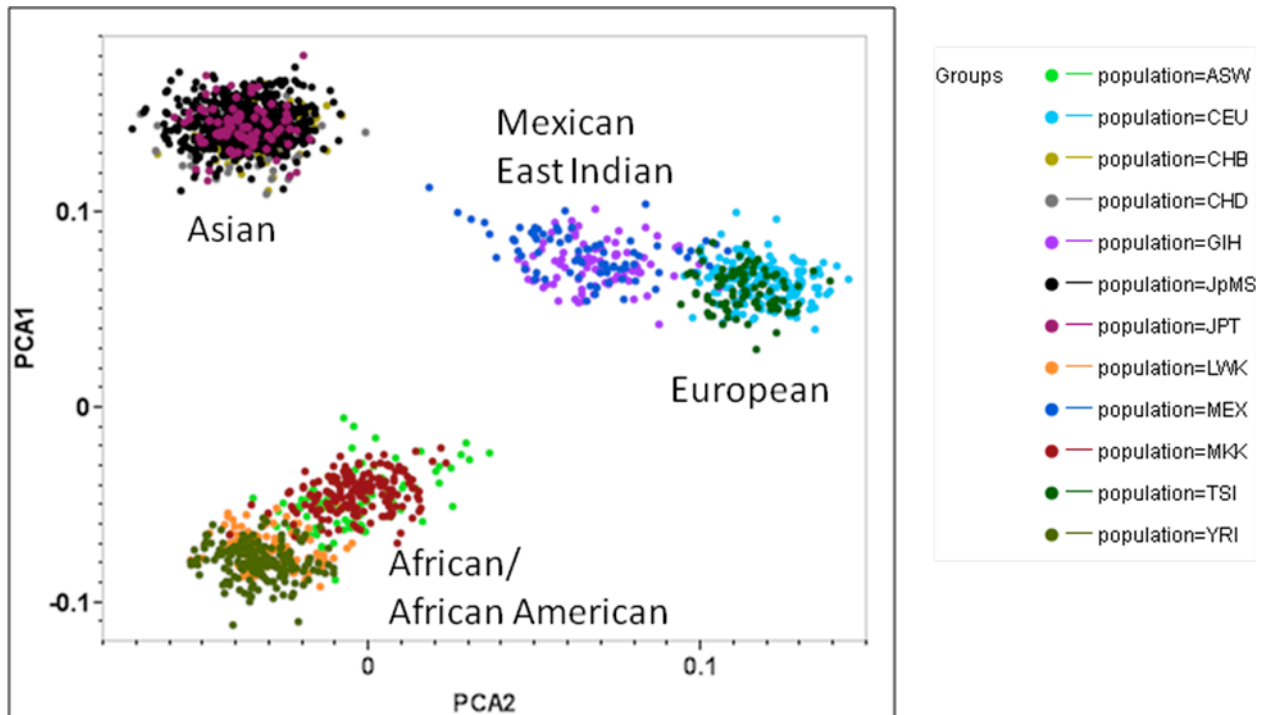

**Supplementary Figure 2: Negative Log<sub>10</sub>(p-value) for Each SNP Plotted onto SNP Position for A) MS vs. Healthy Control, B) AQP4- vs. Healthy Control, and C) AQP4- vs. AQP4+. No SNPs included in the models, and gender included in all models. Red line indicates FDR<sub>p</sub> = 0.1.**

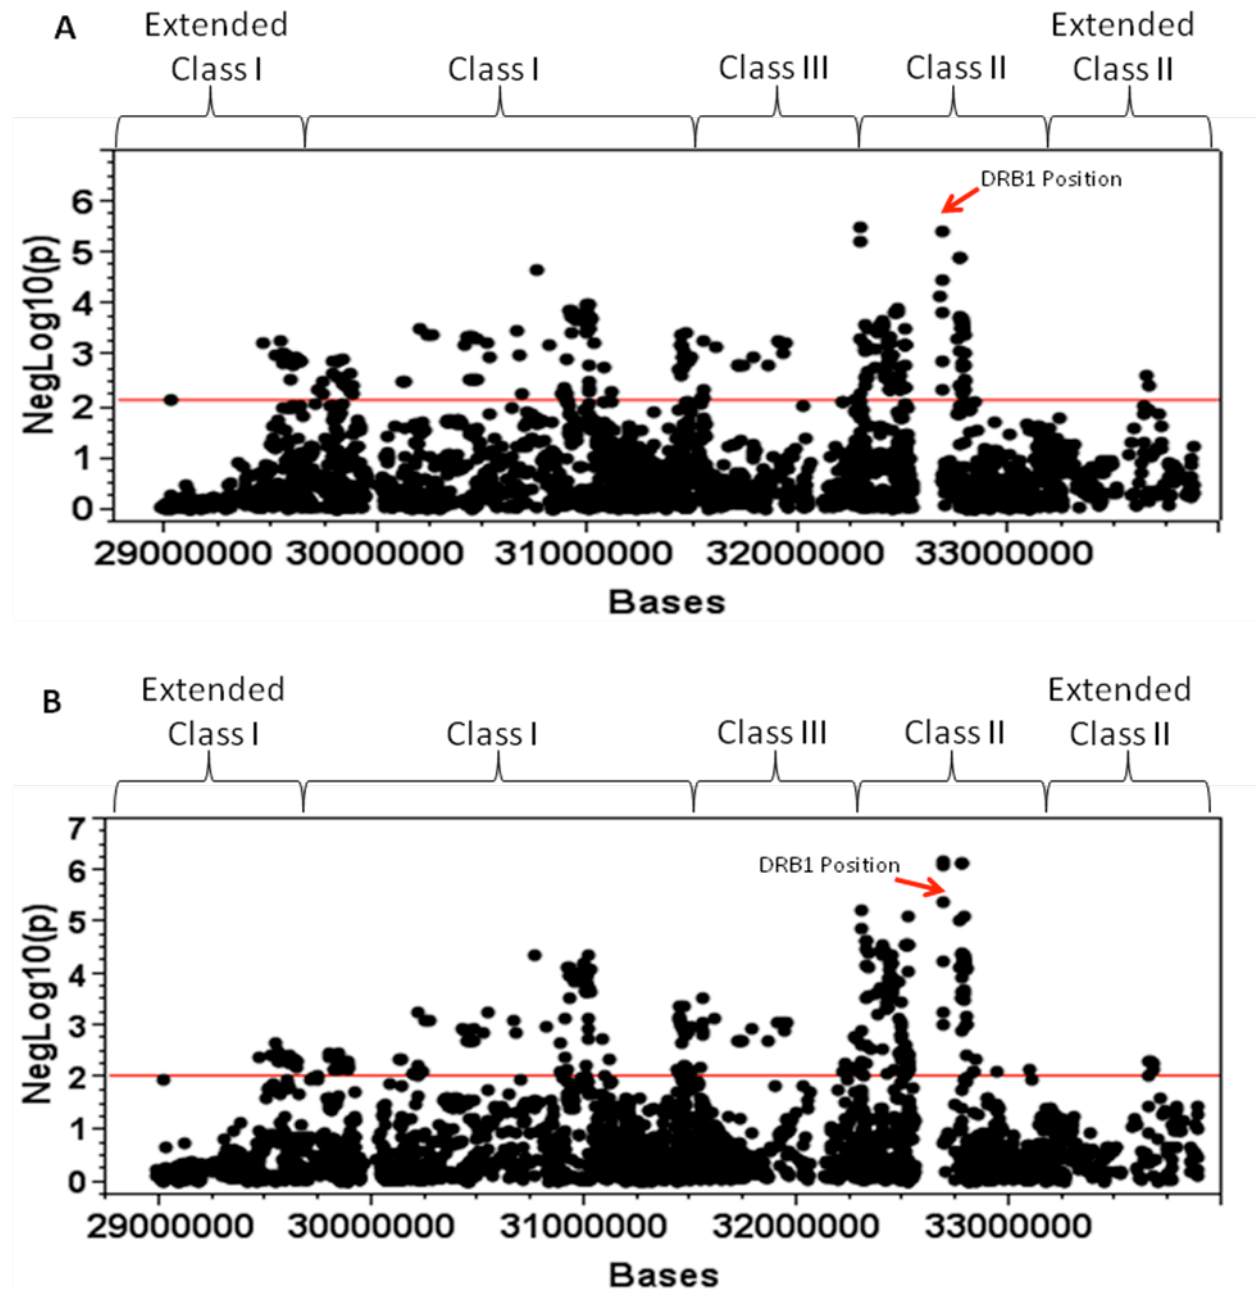

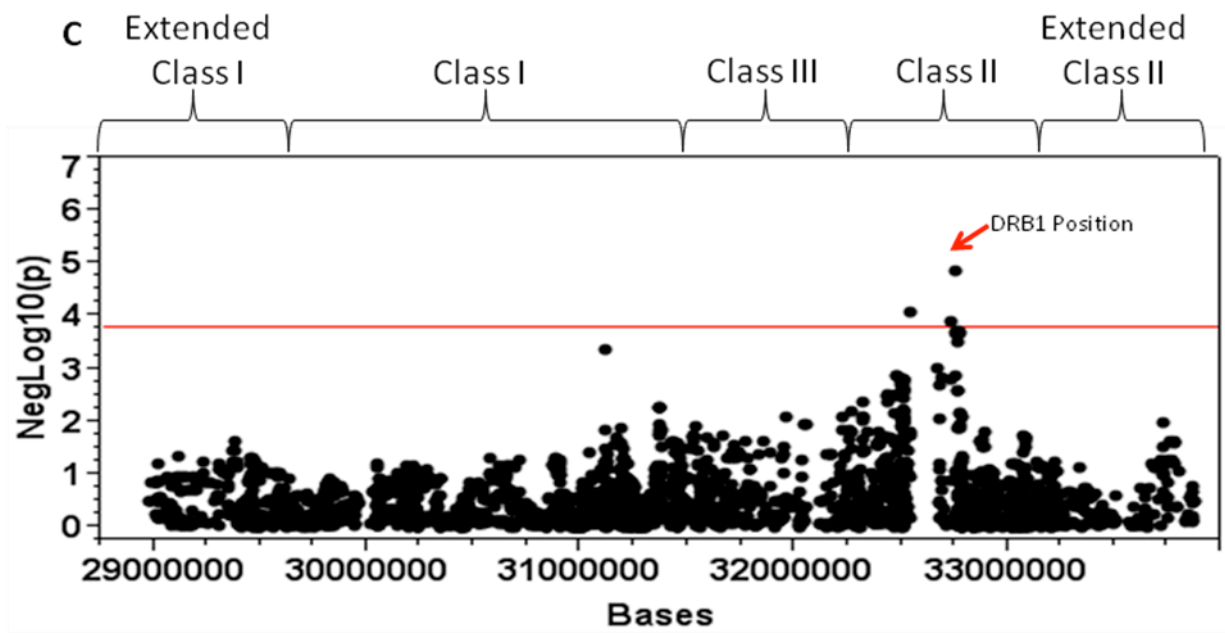

**Supplementary Table 1. Tagging Parameters of the MS Susceptible Significant SNP Haplotypes for DRB1.** Results from analysis of 218 Japanese individuals (both patients and controls) for whom classical DRB1 data were available. The sensitivity is the percentage of a given DRB1 allele that is captured by a given SNP haplotype, and the positive predictive value is the percentage of a given SNP haplotype that captures the particular DRB1 allele. MSvs.Cont = All MS vs. healthy control; Ab-vsCont = AQP4- patients vs. controls; Ab-Ab+ = AQP4- patients vs. AQP4+ patients; Trait = trait for which SNPs making up haplotype were significant; DRB1--Hap = DRB1 allele--SNP haplotype.

| Trait     | DRB1--Hap  | Freq DRB1 Allele | Freq Hap | Joint Freq | D'   | Sensitivity | Specificity | Positive Predictive Value |
|-----------|------------|------------------|----------|------------|------|-------------|-------------|---------------------------|
| MSvs.Cont | 04:05--A-G | 0.18             | 0.66     | 0.18       | 0.96 | 0.99        | 0.41        | 0.27                      |
| MSvs.Cont | 15:01--A-G | 0.10             | 0.66     | 0.10       | 1.00 | 1.00        | 0.38        | 0.16                      |
| MSvs.Cont | 08:03--A-G | 0.08             | 0.66     | 0.08       | 0.75 | 0.92        | 0.36        | 0.12                      |
| MSvs.Cont | 08:02--A-G | 0.06             | 0.66     | 0.05       | 0.84 | 0.95        | 0.36        | 0.08                      |
| MSvs.Cont | 04:06--A-G | 0.04             | 0.66     | 0.04       | 0.85 | 0.95        | 0.35        | 0.06                      |
| MSvs.Cont | 04:03--A-G | 0.03             | 0.66     | 0.03       | 1.00 | 1.00        | 0.35        | 0.05                      |
| MSvs.Cont | 12:02--A-G | 0.03             | 0.66     | 0.03       | 0.76 | 0.92        | 0.35        | 0.04                      |
| MSvs.Cont | 14:01--A-G | 0.03             | 0.66     | 0.02       | 0.11 | 0.70        | 0.34        | 0.03                      |
| MSvs.Cont | 14:05--A-G | 0.02             | 0.66     | 0.02       | 0.69 | 0.89        | 0.35        | 0.03                      |
| MSvs.Cont | 12:01--A-G | 0.05             | 0.66     | 0.02       | 0.41 | 0.39        | 0.33        | 0.03                      |
| MSvs.Cont | 04:10--A-G | 0.02             | 0.66     | 0.02       | 0.42 | 0.80        | 0.34        | 0.03                      |
| MSvs.Cont | 11:01--A-G | 0.02             | 0.66     | 0.01       | 0.18 | 0.72        | 0.34        | 0.02                      |
| MSvs.Cont | 14:06--A-G | 0.01             | 0.66     | 0.01       | 0.51 | 0.83        | 0.34        | 0.02                      |
| MSvs.Cont | 13:02--A-G | 0.05             | 0.66     | 0.01       | 0.70 | 0.20        | 0.32        | 0.01                      |
| MSvs.Cont | 14:03--A-G | 0.01             | 0.66     | 0.01       | 1.00 | 1.00        | 0.34        | 0.01                      |
| MSvs.Cont | 09:01--A-G | 0.08             | 0.66     | 0.01       | 0.86 | 0.09        | 0.29        | 0.01                      |
| MSvs.Cont | 04:04--A-G | 0.01             | 0.66     | 0.01       | 1.00 | 1.00        | 0.34        | 0.01                      |
| MSvs.Cont | 16:02--A-G | 0.01             | 0.66     | 0.01       | 1.00 | 1.00        | 0.34        | 0.01                      |
| MSvs.Cont | 04:01--A-G | 0.01             | 0.66     | 0.00       | 0.02 | 0.67        | 0.34        | 0.01                      |
| MSvs.Cont | 01:01--A-G | 0.06             | 0.66     | 0.00       | 0.94 | 0.04        | 0.30        | 0.00                      |
| MSvs.Cont | 15:02--A-A | 0.10             | 0.18     | 0.10       | 1.00 | 1.00        | 0.91        | 0.53                      |
| MSvs.Cont | 09:01--A-A | 0.08             | 0.18     | 0.03       | 0.33 | 0.45        | 0.84        | 0.19                      |
| MSvs.Cont | 12:01--A-A | 0.05             | 0.18     | 0.02       | 0.36 | 0.48        | 0.84        | 0.13                      |
| MSvs.Cont | 08:03--A-A | 0.08             | 0.18     | 0.01       | 0.53 | 0.08        | 0.81        | 0.04                      |
| MSvs.Cont | 14:01--A-A | 0.03             | 0.18     | 0.00       | 0.16 | 0.15        | 0.82        | 0.03                      |
| MSvs.Cont | 12:02--A-A | 0.03             | 0.18     | 0.00       | 0.53 | 0.08        | 0.82        | 0.01                      |
| MSvs.Cont | 14:05--A-A | 0.02             | 0.18     | 0.00       | 0.40 | 0.11        | 0.82        | 0.01                      |
| MSvs.Cont | 11:01--A-A | 0.02             | 0.18     | 0.00       | 0.22 | 0.14        | 0.82        | 0.01                      |
| MSvs.Cont | 04:01--A-A | 0.01             | 0.18     | 0.00       | 0.19 | 0.33        | 0.82        | 0.01                      |
| MSvs.Cont | 03:01--A-A | 0.00             | 0.18     | 0.00       | 1.00 | 1.00        | 0.82        | 0.01                      |
| MSvs.Cont | 13:01--A-A | 0.00             | 0.18     | 0.00       | 1.00 | 1.00        | 0.82        | 0.01                      |

|            |            |      |      |      |      |      |      |      |
|------------|------------|------|------|------|------|------|------|------|
| MSvs.Cont  | 01:01--G-G | 0.06 | 0.16 | 0.05 | 0.95 | 0.96 | 0.89 | 0.34 |
| MSvs.Cont  | 13:02--G-G | 0.05 | 0.16 | 0.04 | 0.71 | 0.76 | 0.88 | 0.24 |
| MSvs.Cont  | 09:01--G-G | 0.08 | 0.16 | 0.03 | 0.32 | 0.42 | 0.87 | 0.21 |
| MSvs.Cont  | 10:01--G-G | 0.00 | 0.16 | 0.00 | 1.00 | 1.00 | 0.85 | 0.03 |
| MSvs.Cont  | 14:01--G-G | 0.03 | 0.16 | 0.00 | 0.01 | 0.15 | 0.84 | 0.03 |
| MSvs.Cont  | 12:01--G-G | 0.05 | 0.16 | 0.00 | 0.44 | 0.09 | 0.84 | 0.03 |
| MSvs.Cont  | 04:10--G-G | 0.02 | 0.16 | 0.00 | 0.05 | 0.20 | 0.85 | 0.03 |
| MSvs.Cont  | 08:02--G-G | 0.06 | 0.16 | 0.00 | 0.65 | 0.05 | 0.84 | 0.02 |
| MSvs.Cont  | 04:05--G-G | 0.18 | 0.16 | 0.00 | 0.92 | 0.01 | 0.81 | 0.01 |
| MSvs.Cont  | 04:06--G-G | 0.04 | 0.16 | 0.00 | 0.66 | 0.05 | 0.84 | 0.01 |
| MSvs.Cont  | 11:01--G-G | 0.02 | 0.16 | 0.00 | 0.10 | 0.14 | 0.84 | 0.01 |
| MSvs.Cont  | 14:06--G-G | 0.01 | 0.16 | 0.00 | 0.01 | 0.17 | 0.85 | 0.01 |
| MSvs.Cont  | 04:07--G-G | 0.00 | 0.16 | 0.00 | 1.00 | 1.00 | 0.85 | 0.01 |
| MSvs.Cont  | 09:01--G-A | 0.08 | 0.01 | 0.00 | 0.33 | 0.04 | 0.99 | 0.38 |
| MSvs.Cont  | 12:01--G-A | 0.05 | 0.01 | 0.00 | 0.28 | 0.05 | 0.99 | 0.31 |
| MSvs.Cont  | 13:02--G-A | 0.05 | 0.01 | 0.00 | 0.27 | 0.05 | 0.99 | 0.31 |
| Ab-vs.Cont | 04:05--G-G | 0.18 | 0.38 | 0.17 | 0.93 | 0.95 | 0.75 | 0.46 |
| Ab-vs.Cont | 08:02--G-G | 0.06 | 0.38 | 0.06 | 1.00 | 1.00 | 0.66 | 0.15 |
| Ab-vs.Cont | 04:06--G-G | 0.04 | 0.38 | 0.04 | 1.00 | 1.00 | 0.65 | 0.12 |
| Ab-vs.Cont | 04:03--G-G | 0.03 | 0.38 | 0.03 | 1.00 | 1.00 | 0.64 | 0.08 |
| Ab-vs.Cont | 12:02--G-G | 0.03 | 0.38 | 0.03 | 1.00 | 1.00 | 0.64 | 0.08 |
| Ab-vs.Cont | 04:10--G-G | 0.02 | 0.38 | 0.02 | 0.82 | 0.89 | 0.63 | 0.05 |
| Ab-vs.Cont | 04:01--G-G | 0.01 | 0.38 | 0.01 | 1.00 | 1.00 | 0.63 | 0.02 |
| Ab-vs.Cont | 04:04--G-G | 0.01 | 0.38 | 0.00 | 0.47 | 0.67 | 0.63 | 0.01 |
| Ab-vs.Cont | 08:03--G-G | 0.08 | 0.38 | 0.00 | 0.93 | 0.03 | 0.59 | 0.01 |
| Ab-vs.Cont | 09:01--G-G | 0.08 | 0.38 | 0.00 | 0.92 | 0.03 | 0.60 | 0.01 |
| Ab-vs.Cont | 13:02--G-G | 0.05 | 0.38 | 0.00 | 0.87 | 0.05 | 0.61 | 0.01 |
| Ab-vs.Cont | 12:01--G-G | 0.05 | 0.38 | 0.00 | 0.87 | 0.05 | 0.61 | 0.01 |
| Ab-vs.Cont | 14:06--G-G | 0.01 | 0.38 | 0.00 | 0.56 | 0.17 | 0.62 | 0.01 |
| Ab-vs.Cont | 04:07--G-G | 0.00 | 0.38 | 0.00 | 1.00 | 1.00 | 0.63 | 0.01 |
| Ab-vs.Cont | 15:01--A-G | 0.10 | 0.57 | 0.10 | 1.00 | 1.00 | 0.48 | 0.18 |
| Ab-vs.Cont | 15:02--A-G | 0.10 | 0.57 | 0.10 | 1.00 | 1.00 | 0.48 | 0.17 |
| Ab-vs.Cont | 08:03--A-G | 0.08 | 0.57 | 0.08 | 0.78 | 0.91 | 0.47 | 0.13 |
| Ab-vs.Cont | 09:01--A-G | 0.08 | 0.57 | 0.07 | 0.93 | 0.97 | 0.47 | 0.13 |
| Ab-vs.Cont | 01:01--A-G | 0.06 | 0.57 | 0.06 | 1.00 | 1.00 | 0.46 | 0.10 |
| Ab-vs.Cont | 12:01--A-G | 0.05 | 0.57 | 0.04 | 0.56 | 0.81 | 0.45 | 0.07 |
| Ab-vs.Cont | 14:01--A-G | 0.03 | 0.57 | 0.03 | 1.00 | 1.00 | 0.45 | 0.05 |
| Ab-vs.Cont | 14:05--A-G | 0.02 | 0.57 | 0.02 | 1.00 | 1.00 | 0.44 | 0.04 |
| Ab-vs.Cont | 11:01--A-G | 0.02 | 0.57 | 0.02 | 1.00 | 1.00 | 0.44 | 0.03 |
| Ab-vs.Cont | 14:06--A-G | 0.01 | 0.57 | 0.01 | 0.62 | 0.83 | 0.44 | 0.02 |
| Ab-vs.Cont | 13:02--A-G | 0.05 | 0.57 | 0.01 | 0.66 | 0.20 | 0.41 | 0.02 |
| Ab-vs.Cont | 14:03--A-G | 0.01 | 0.57 | 0.01 | 1.00 | 1.00 | 0.44 | 0.02 |
| Ab-vs.Cont | 16:02--A-G | 0.01 | 0.57 | 0.01 | 1.00 | 1.00 | 0.44 | 0.01 |

|            |            |      |      |      |      |      |      |      |
|------------|------------|------|------|------|------|------|------|------|
| Ab-vs.Cont | 10:01--A-G | 0.00 | 0.57 | 0.00 | 1.00 | 1.00 | 0.44 | 0.01 |
| Ab-vs.Cont | 04:05--A-G | 0.18 | 0.57 | 0.00 | 0.98 | 0.01 | 0.31 | 0.00 |
| Ab-vs.Cont | 04:04--A-G | 0.01 | 0.57 | 0.00 | 0.41 | 0.33 | 0.43 | 0.00 |
| Ab-vs.Cont | 03:01--A-G | 0.00 | 0.57 | 0.00 | 1.00 | 1.00 | 0.44 | 0.00 |
| Ab-vs.Cont | 13:01--A-G | 0.00 | 0.57 | 0.00 | 1.00 | 1.00 | 0.44 | 0.00 |
| Ab-vs.Cont | 13:02--A-A | 0.05 | 0.05 | 0.04 | 0.74 | 0.76 | 0.99 | 0.75 |
| Ab-vs.Cont | 12:01--A-A | 0.05 | 0.05 | 0.01 | 0.10 | 0.14 | 0.96 | 0.14 |
| Ab-vs.Cont | 08:03--A-A | 0.08 | 0.05 | 0.01 | 0.03 | 0.07 | 0.95 | 0.11 |
| Ab-vs.Cont | 04:05--G-A | 0.18 | 0.01 | 0.01 | 0.65 | 0.03 | 1.00 | 0.72 |
| Ab-vs.Cont | 04:10--G-A | 0.02 | 0.01 | 0.00 | 0.27 | 0.11 | 0.99 | 0.28 |
| Ab-Ab+     | 04:05--A   | 0.18 | 0.76 | 0.18 | 0.95 | 0.99 | 0.29 | 0.23 |
| Ab-Ab+     | 15:01--A   | 0.10 | 0.76 | 0.10 | 0.86 | 0.97 | 0.26 | 0.13 |
| Ab-Ab+     | 15:02--A   | 0.10 | 0.76 | 0.09 | 0.84 | 0.96 | 0.26 | 0.12 |
| Ab-Ab+     | 08:03--A   | 0.08 | 0.76 | 0.08 | 0.88 | 0.97 | 0.26 | 0.11 |
| Ab-Ab+     | 01:01--A   | 0.06 | 0.76 | 0.06 | 1.00 | 1.00 | 0.25 | 0.07 |
| Ab-Ab+     | 08:02--A   | 0.06 | 0.76 | 0.06 | 1.00 | 1.00 | 0.25 | 0.07 |
| Ab-Ab+     | 13:02--A   | 0.05 | 0.76 | 0.05 | 0.80 | 0.95 | 0.25 | 0.06 |
| Ab-Ab+     | 04:06--A   | 0.04 | 0.76 | 0.04 | 1.00 | 1.00 | 0.25 | 0.06 |
| Ab-Ab+     | 04:03--A   | 0.03 | 0.76 | 0.03 | 0.67 | 0.92 | 0.24 | 0.04 |
| Ab-Ab+     | 04:10--A   | 0.02 | 0.76 | 0.02 | 1.00 | 1.00 | 0.24 | 0.03 |
| Ab-Ab+     | 14:05--A   | 0.02 | 0.76 | 0.02 | 0.56 | 0.89 | 0.24 | 0.03 |
| Ab-Ab+     | 14:01--A   | 0.03 | 0.76 | 0.01 | 0.69 | 0.24 | 0.22 | 0.01 |
| Ab-Ab+     | 04:04--A   | 0.01 | 0.76 | 0.01 | 1.00 | 1.00 | 0.24 | 0.01 |
| Ab-Ab+     | 09:01--A   | 0.08 | 0.76 | 0.00 | 0.92 | 0.06 | 0.18 | 0.01 |
| Ab-Ab+     | 12:01--A   | 0.05 | 0.76 | 0.00 | 0.87 | 0.10 | 0.21 | 0.01 |
| Ab-Ab+     | 04:01--A   | 0.01 | 0.76 | 0.00 | 0.12 | 0.67 | 0.24 | 0.01 |
| Ab-Ab+     | 14:06--A   | 0.01 | 0.76 | 0.00 | 0.78 | 0.17 | 0.23 | 0.00 |
| Ab-Ab+     | 10:01--A   | 0.00 | 0.76 | 0.00 | 0.34 | 0.50 | 0.24 | 0.00 |
| Ab-Ab+     | 04:07--A   | 0.00 | 0.76 | 0.00 | 1.00 | 1.00 | 0.24 | 0.00 |
| Ab-Ab+     | 13:01--A   | 0.00 | 0.76 | 0.00 | 1.00 | 1.00 | 0.24 | 0.00 |
| Ab-Ab+     | 09:01--G   | 0.08 | 0.24 | 0.07 | 0.92 | 0.94 | 0.82 | 0.30 |
| Ab-Ab+     | 12:01--G   | 0.05 | 0.24 | 0.04 | 0.87 | 0.90 | 0.79 | 0.18 |
| Ab-Ab+     | 12:02--G   | 0.03 | 0.24 | 0.03 | 1.00 | 1.00 | 0.78 | 0.13 |
| Ab-Ab+     | 14:01--G   | 0.03 | 0.24 | 0.02 | 0.69 | 0.76 | 0.78 | 0.10 |
| Ab-Ab+     | 11:01--G   | 0.02 | 0.24 | 0.02 | 1.00 | 1.00 | 0.77 | 0.07 |
| Ab-Ab+     | 14:06--G   | 0.01 | 0.24 | 0.01 | 0.78 | 0.83 | 0.77 | 0.05 |
| Ab-Ab+     | 14:03--G   | 0.01 | 0.24 | 0.01 | 1.00 | 1.00 | 0.77 | 0.04 |
| Ab-Ab+     | 16:02--G   | 0.01 | 0.24 | 0.01 | 1.00 | 1.00 | 0.77 | 0.03 |
| Ab-Ab+     | 15:02--G   | 0.10 | 0.24 | 0.00 | 0.84 | 0.04 | 0.74 | 0.01 |
| Ab-Ab+     | 15:01--G   | 0.10 | 0.24 | 0.00 | 0.86 | 0.03 | 0.74 | 0.01 |
| Ab-Ab+     | 14:05--G   | 0.02 | 0.24 | 0.00 | 0.56 | 0.11 | 0.76 | 0.01 |
| Ab-Ab+     | 04:03--G   | 0.03 | 0.24 | 0.00 | 0.67 | 0.08 | 0.76 | 0.01 |
| Ab-Ab+     | 04:05--G   | 0.18 | 0.24 | 0.00 | 0.95 | 0.01 | 0.71 | 0.01 |

|        |          |      |      |      |      |      |      |      |
|--------|----------|------|------|------|------|------|------|------|
| Ab-Ab+ | 08:03--G | 0.08 | 0.24 | 0.00 | 0.88 | 0.03 | 0.74 | 0.01 |
| Ab-Ab+ | 13:02--G | 0.05 | 0.24 | 0.00 | 0.80 | 0.05 | 0.75 | 0.01 |
| Ab-Ab+ | 04:01--G | 0.01 | 0.24 | 0.00 | 0.12 | 0.33 | 0.76 | 0.01 |
| Ab-Ab+ | 10:01--G | 0.00 | 0.24 | 0.00 | 0.34 | 0.50 | 0.76 | 0.01 |
| Ab-Ab+ | 03:01--G | 0.00 | 0.24 | 0.00 | 1.00 | 1.00 | 0.76 | 0.01 |

**Supplementary Figure 3. Distribution of DRB1 Alleles for Each MS Susceptible Significant Haplotype.**

The size of the slices indicates the positive predictive value for each haplotype. Each slice is labeled with the DRB1 allele and specificity (in parentheses). Haplotypes with positive predictive value < 5% not shown. A) All MS haplotypes. B) AQP4- haplotypes. C) AQP4- vs. AQP4+ SNP.

**A**

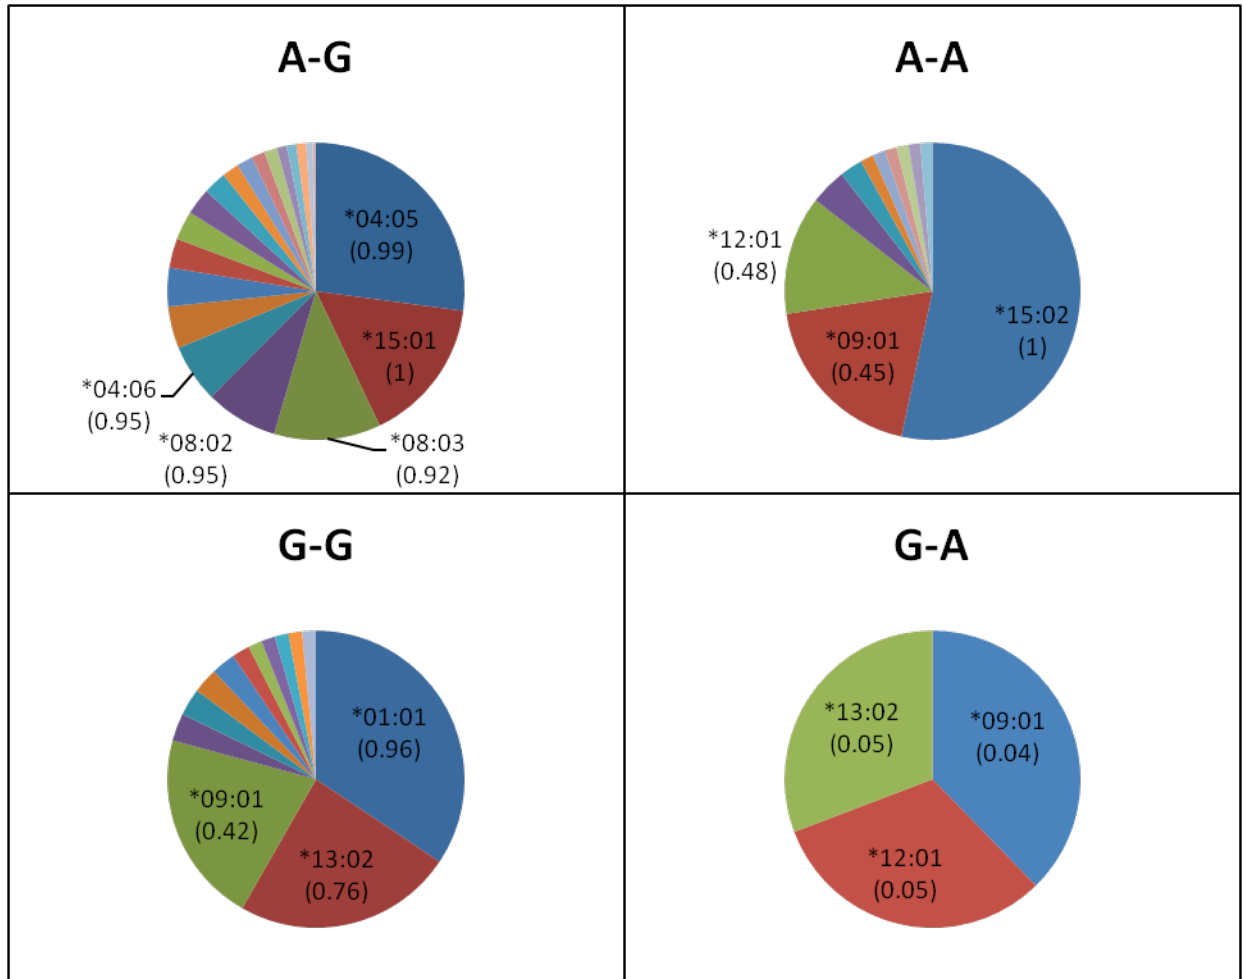



**B**

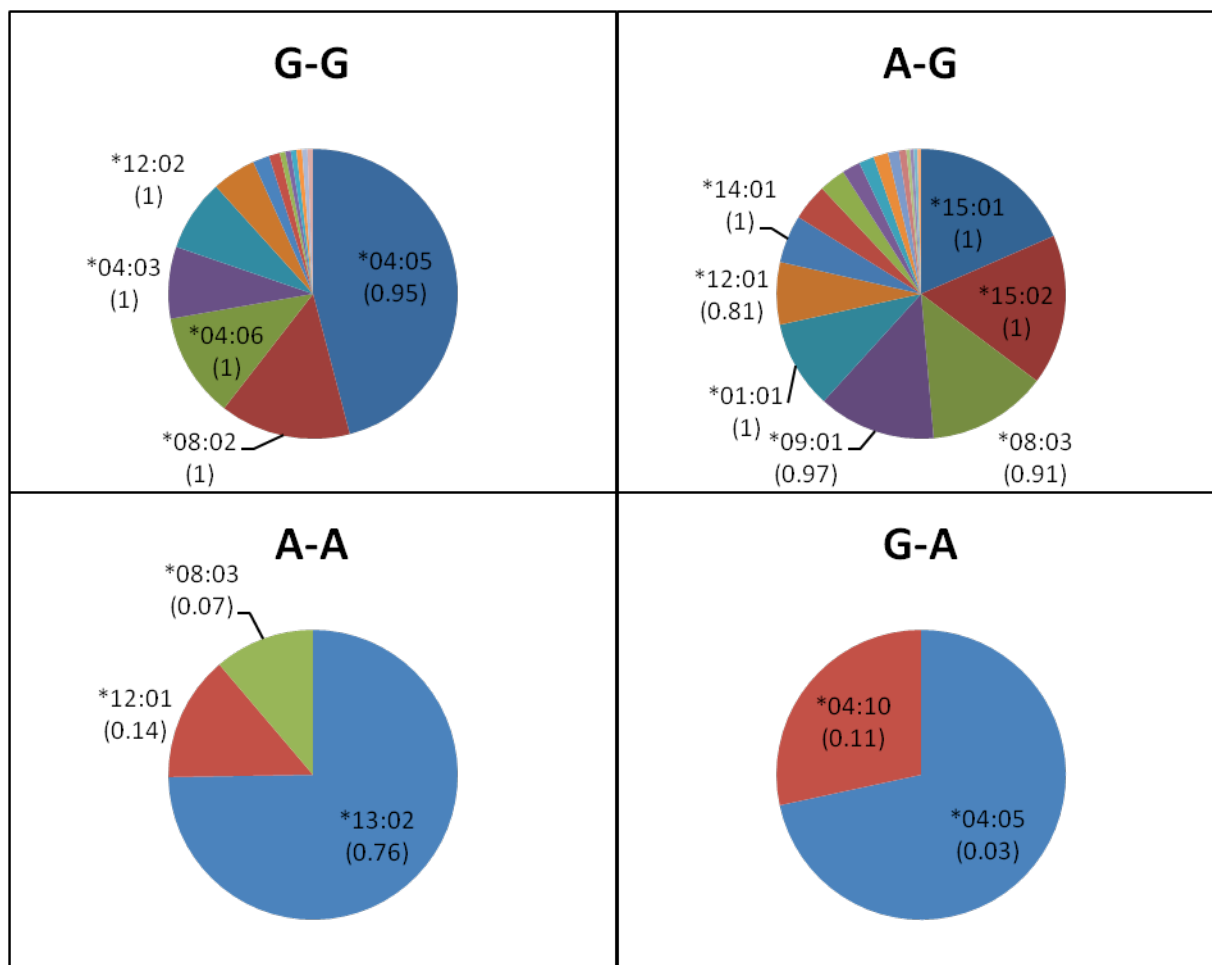

**C**

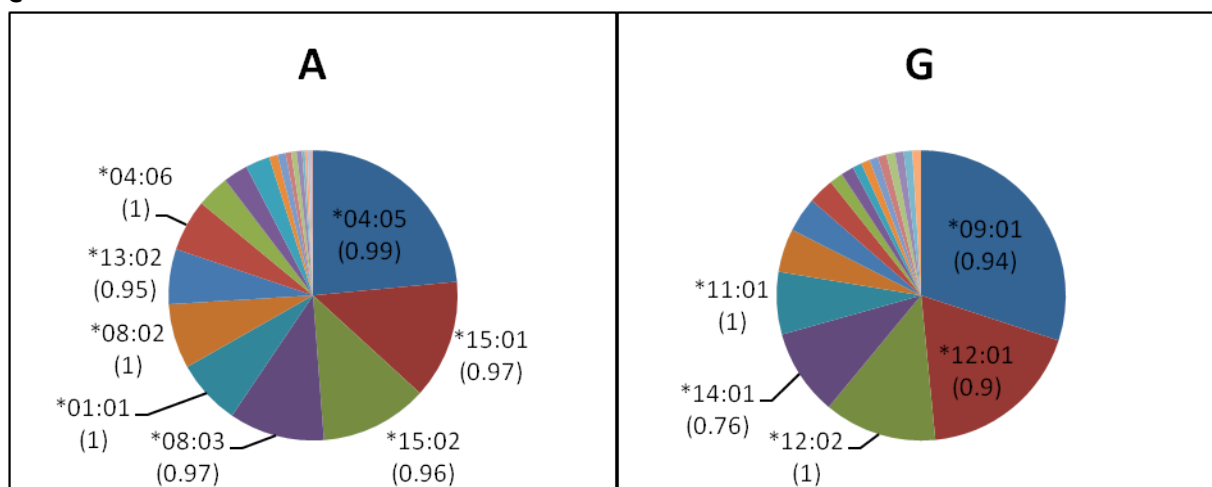

**Supplementary Figure 4: Scree Plot of the First Ten Principal Components for the Experimental Sample.** Components were calculated using 3,668 non-chromosome 6 SNPs.

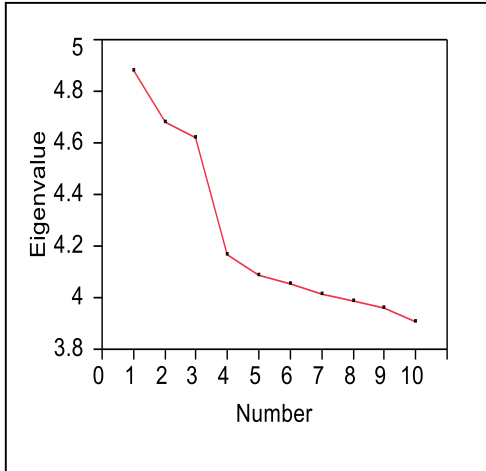

**Supplementary Figure 5: Graph of Experimental Sample onto the First Three Components.** Three obvious outliers were detected. Red dots are controls, Blue dots are patients.

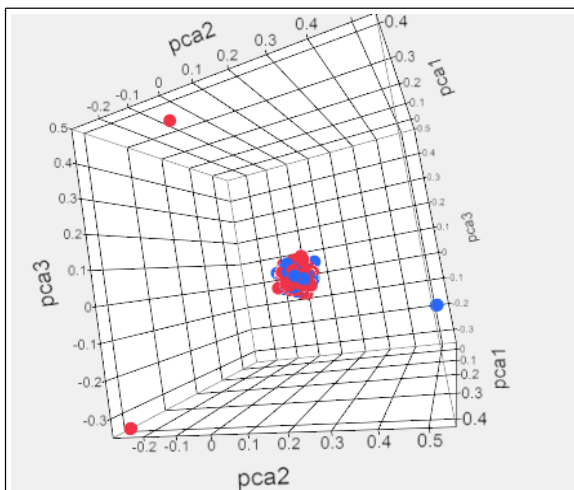

**Supplementary Figure 6: T<sup>2</sup> Statistic Plot of First Three Principal Components to Identify Outliers.** Red dots are controls, blue dots are patients. The dotted line represents the upper control limit.

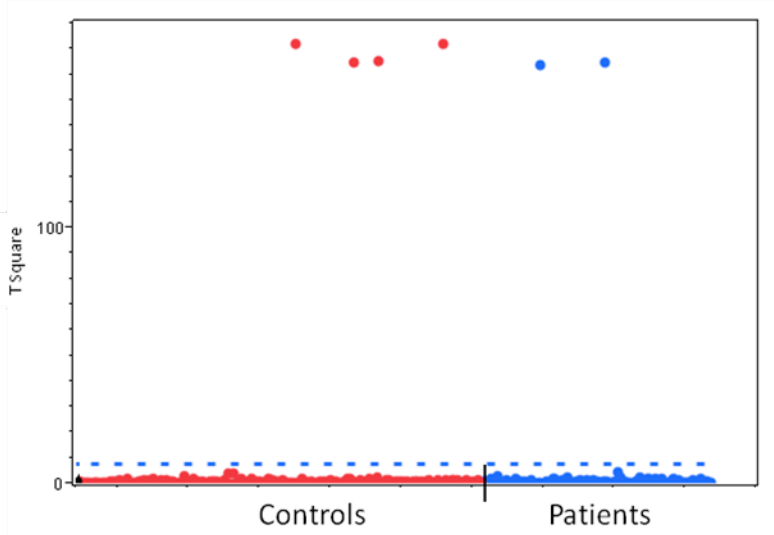

Supplement: NIHMS374860-supplement-Supplementary_files.pdf [file NIHMS374860-supplement-Supplementary_files.pdf]
